# Supplementary material for: A microporous scandium terephthalate, Sc2(O2CC6H4CO2)3, with high thermal stability
Source: Royal Society of Chemistry journal article supplement (doi:10.1039/b506677h), 2005-01-01

Supplementary data for

## A microporous scandium terephthalate, $\text{Sc}_2(\text{O}_2\text{C}_6\text{H}_4\text{CO}_2)_3$ , with high thermal stability

S.R. Miller,<sup>a</sup> P.A. Wright,<sup>a,\*</sup> C. Serre,<sup>b</sup> T. Loiseau,<sup>b</sup> J. Marrot<sup>b</sup> and G. Férey<sup>b</sup>

Matched powder X-ray diffraction pattern, measured on a STOE Stadi/p diffractometer using Cu  $\text{K}\alpha_1$  X-radiation, using the structure determined from single crystal data and refining instrumental parameters. F ddd,  $a = 8.7495(6)\text{\AA}$ ,  $b = 20.7701(7)\text{\AA}$ ,  $c = 34.3728(12)\text{\AA}$  (Rwp = 13.5%)

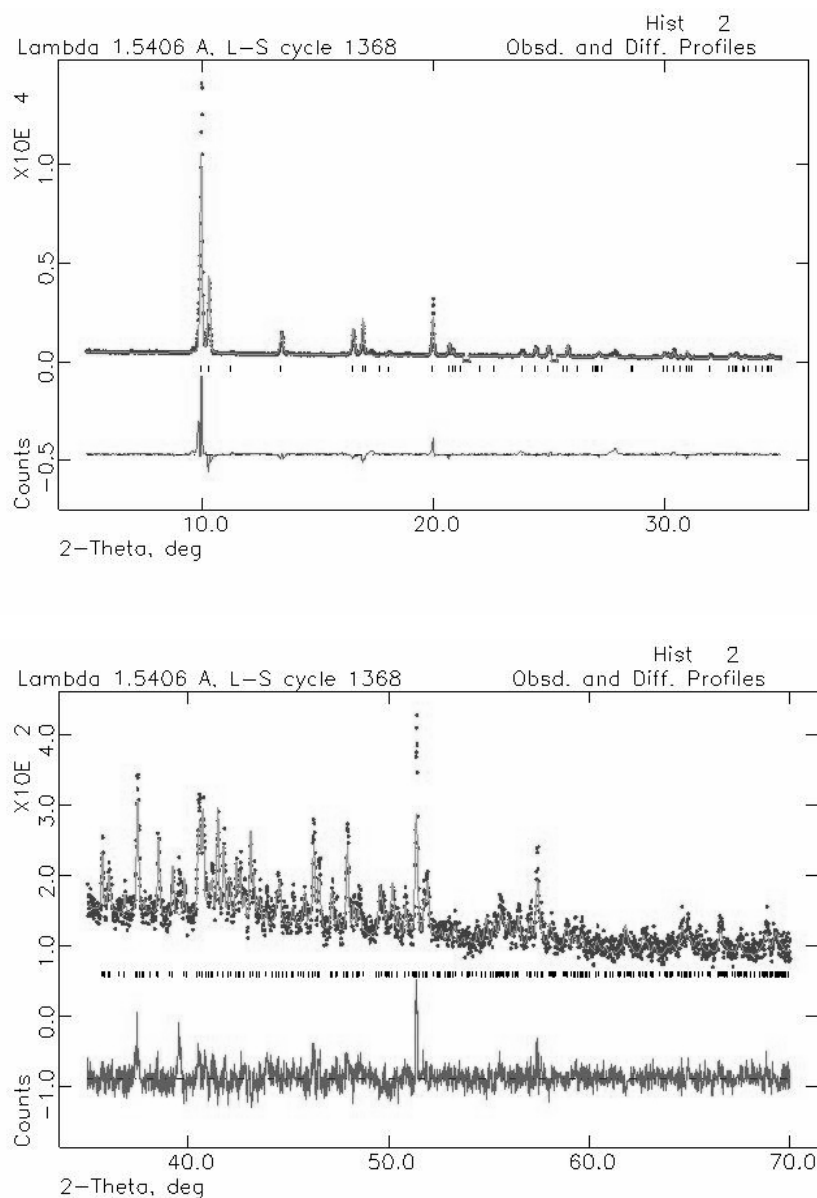

Supplement: b506677h.pdf [file b506677h.pdf]
